# Supplementary material for: Shroom2, a myosin-VIIa- and actin-binding protein, directly interacts with ZO-1 at tight junctions
Source: Oxford University Press journal article supplement (doi:10.1242/jcs.002568), 2007-08-01

## A GFP-tagged mShrm2 full length (aa 1-1487) at cell-cell contacts

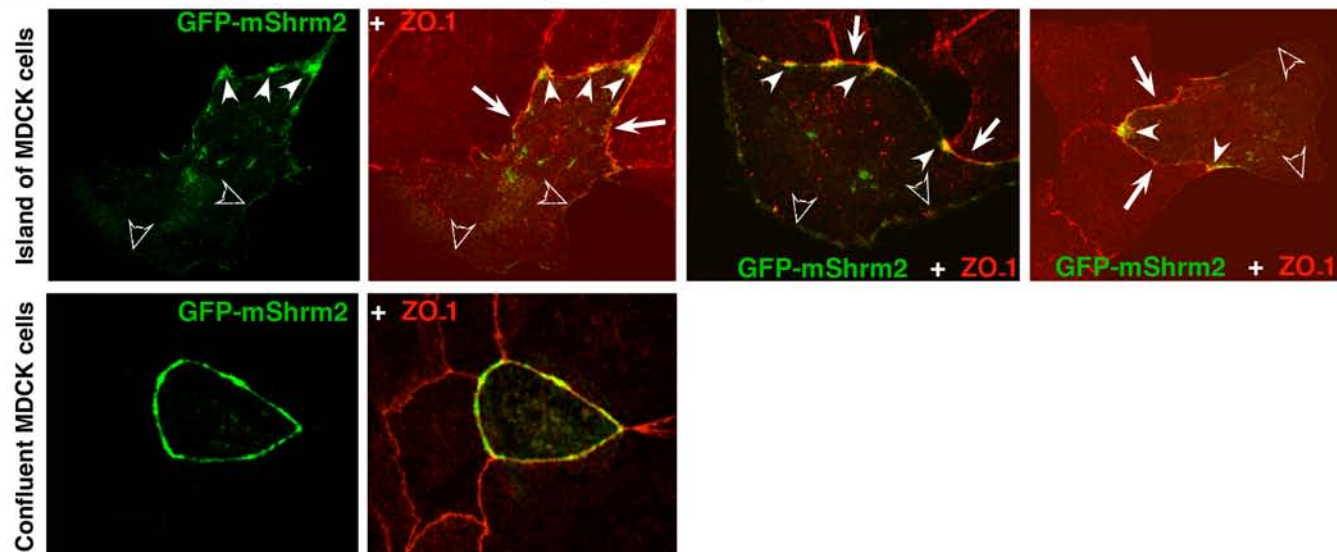

## B GFP-tagged mShrm2-MBR (aa 350-721) at cell-cell contacts

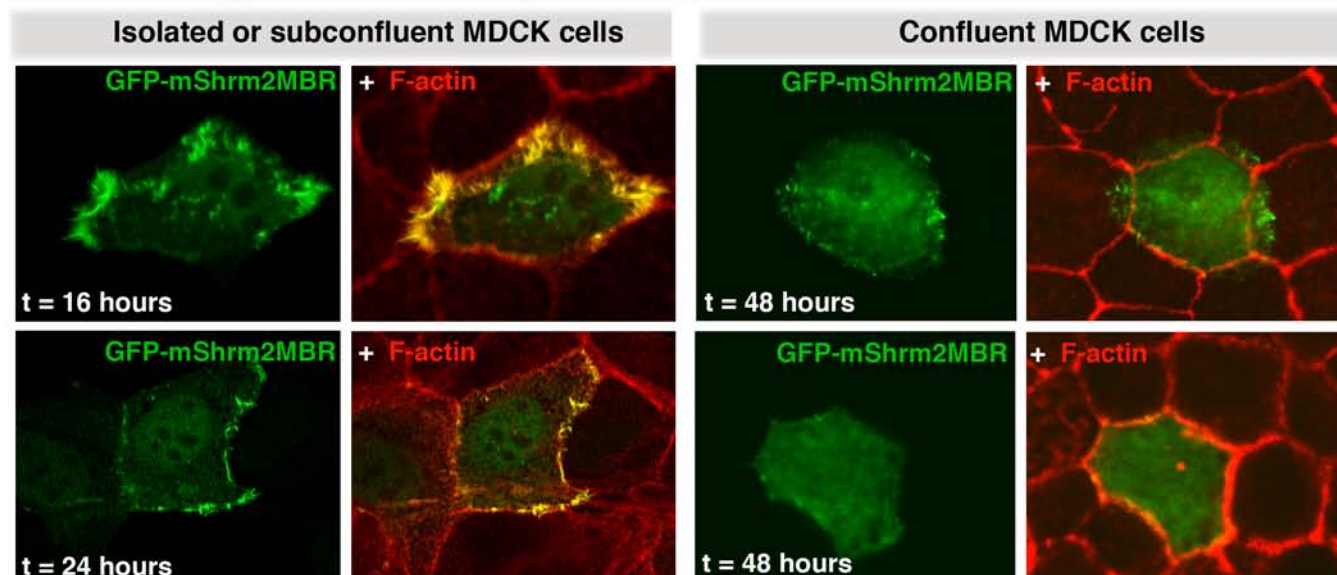

## C Distribution of GFP and ZO-1 in MDCK cells producing GFP alone

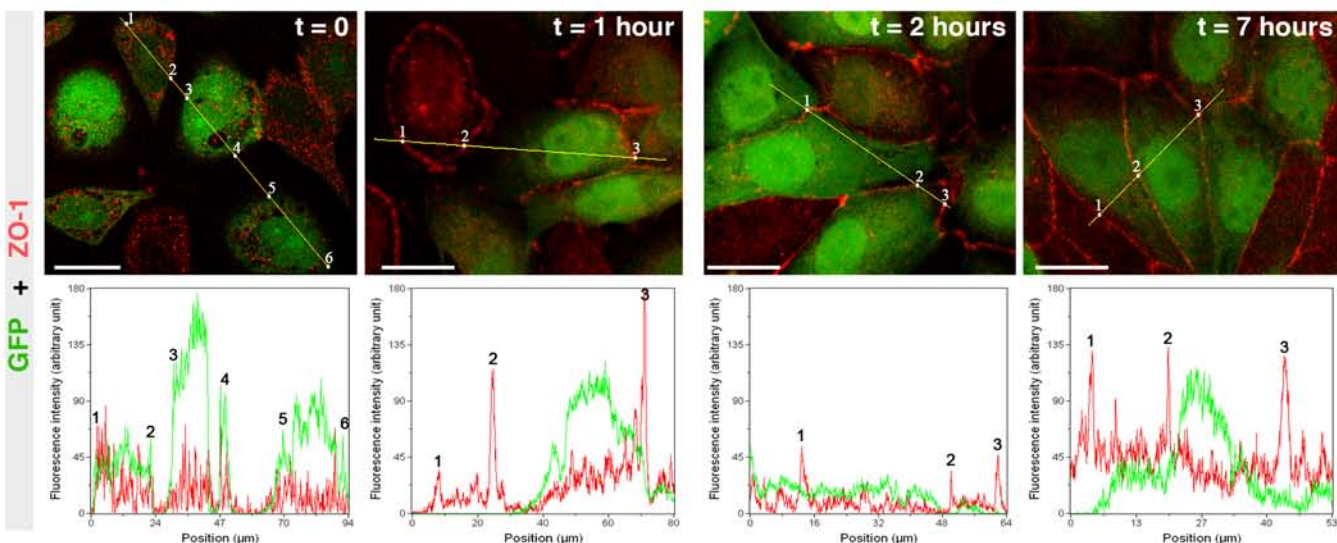

Supplement: jcs002568figs6.pdf [file jcs002568figs6.pdf]
