# Supplementary figures and images for: Shroom2, a myosin-VIIa- and actin-binding protein, directly interacts with ZO-1 at tight junctions
Source: Oxford University Press journal article supplement (doi:10.1242/jcs.002568), 2007-08-01

## A Shroom2 and its binding partners

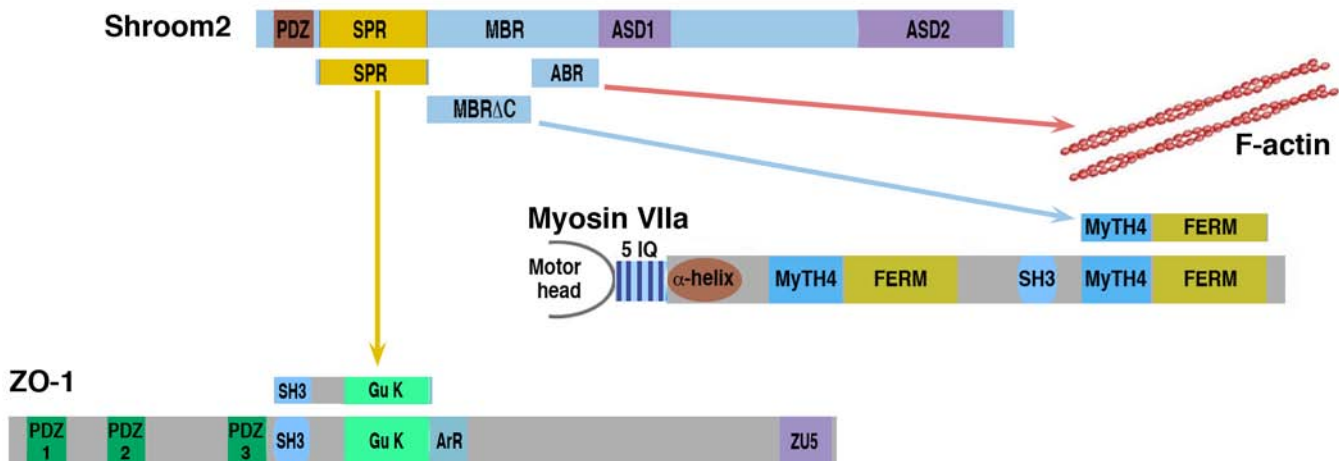

## B Shroom2 at tight junctions

xShrm1  
Shrm2  
Shrm3a

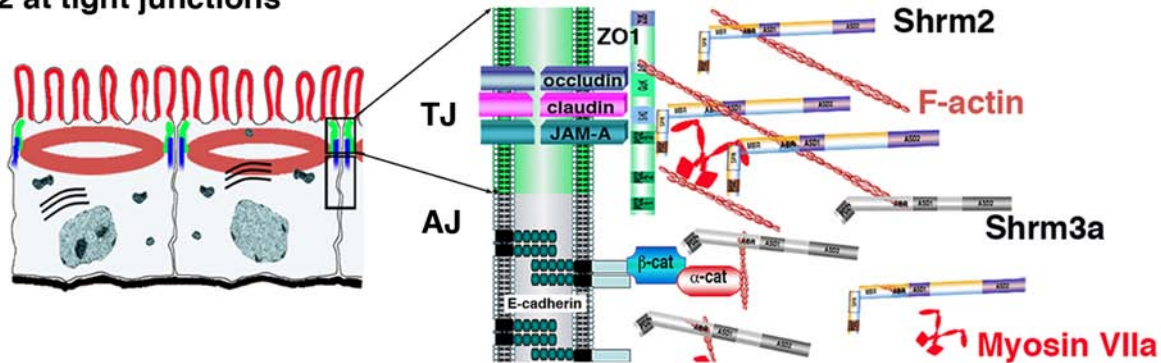

Supplement: jcs002568figs7.pdf [file jcs002568figs7.pdf]
